# Supplementary material for: Self-Reported Eating Speed Is Associated with Indicators of Obesity in Adults: A Systematic Review and Meta-Analysis
Source: MDPI journal article supplement (doi:10.3390/healthcare9111559), 2021-11-16
Supplement: s1 [file s1]

Supplementary Table S1 Quality assessment of the articles

|                                                                    | Methodological item for non-randomized studies score (MINORS) |                                     |                                  |                                                 |                                             |                                                        |                                  |                                             | Additional criteria in the case of comparative study in MINORS |                        |                                   |                                  |       |
|--------------------------------------------------------------------|---------------------------------------------------------------|-------------------------------------|----------------------------------|-------------------------------------------------|---------------------------------------------|--------------------------------------------------------|----------------------------------|---------------------------------------------|----------------------------------------------------------------|------------------------|-----------------------------------|----------------------------------|-------|
| Study                                                              | 1.A clear stated aim                                          | 2.Inclusion of consecutive patients | 3.Prospective collection of data | 4.Endpoints appropriate to the aim of the study | 5.Unbiased assessment of the study endpoint | 6.Follow-up period appropriate to the aim of the study | 7.Loss to follow up less than 5% | 8.Prospective calculation of the study size | 9.An adequate control group                                    | 10.Contemporary groups | 11.Baseline equivalence of groups | 12.Adequate statistical analyses | Total |
| [50] (Leong, Madden, Gray, Waters, & Horwath, 2011)<br>New Zealand | 2                                                             | 1                                   | 2                                | 2                                               | 1                                           | NA                                                     | NA                               | NA                                          | NA                                                             | NA                     | NA                                | NA                               | 8     |
| [44] (Iwasaki, Hirose, Azuma, Ohashi, et al., 2019)<br>Japan       | 2                                                             | 1                                   | 2                                | 2                                               | 1                                           | 2                                                      | 0                                | 0                                           | NA                                                             | NA                     | NA                                | NA                               | 10    |
| [39] (Paz-Graniel, Babio, Mendez, & Salas-Salvadó, 2019)<br>Spain  | 2                                                             | 2                                   | 2                                | 2                                               | 1                                           | NA                                                     | NA                               | NA                                          | NA                                                             | NA                     | NA                                | NA                               | 9     |
| [45](Zhu, Haruyama, Muto, &                                        | 2                                                             | 2                                   | 2                                | 2                                               | 1                                           | 1                                                      | 2                                | 1                                           | NA                                                             | NA                     | NA                                | NA                               | 13    |

|                                                                         |   |   |   |   |   |    |    |    |    |    |    |    |    |
|-------------------------------------------------------------------------|---|---|---|---|---|----|----|----|----|----|----|----|----|
| Yamazaki,<br>2015)<br>Japan                                             |   |   |   |   |   |    |    |    |    |    |    |    |    |
| [51] (Sonoda et<br>al., 2018)<br>Japan                                  | 2 | 1 | 1 | 2 | 1 | NA | 7  |
| [52] (Xie et al.,<br>2019)<br>China                                     | 2 | 2 | 2 | 2 | 1 | NA | 9  |
| [46] (Tanihara<br>et al., 2011)<br>Japan                                | 1 | 1 | 2 | 2 | 1 | 2  | 0  | 0  | NA | NA | NA | NA | 9  |
| [53](Nagahama<br>et al., 2014)<br>Japan                                 | 2 | 2 | 2 | 2 | 1 | NA | 9  |
| [54] (Iwasaki,<br>Hirose, Azuma,<br>Watanabe, et<br>al., 2019)<br>Japan | 2 | 1 | 2 | 2 | 1 | NA | 8  |
| [55]<br>(Mochizuki et<br>al., 2014)<br>Japan                            | 2 | 2 | 2 | 2 | 1 | NA | 9  |
| [56]<br>(Wakasugi,<br>Kazama, &<br>Narita, 2018)<br>Japan               | 2 | 2 | 2 | 2 | 1 | NA | 9  |
| [62] (Sakurai et<br>al., 2012)<br>Japan                                 | 2 | 2 | 2 | 2 | 1 | 2  | 2  | 2  | NA | NA | NA | NA | 15 |
| [59] (Shan et<br>al., 2019)<br>China                                    | 2 | 1 | 1 | 2 | 1 | NA | 7  |

|                                                         |   |   |   |   |   |    |    |    |    |    |    |    |    |
|---------------------------------------------------------|---|---|---|---|---|----|----|----|----|----|----|----|----|
| [57] (Hamada et al., 2017)<br>Japan                     | 2 | 2 | 2 | 2 | 1 | NA | 9  |
| [58] (Oda-Montecinos, Saldaña, & Andrés, 2013)<br>Chile | 2 | 1 | 2 | 1 | 1 | NA | 7  |
| [47] (Nanri et al., 2020)<br>Japan                      | 2 | 2 | 2 | 2 | 1 | 2  | 0  | 0  | NA | NA | NA | NA | 11 |
| [60] (Otsuka et al., 2008)                              | 2 | 2 | 2 | 2 | 1 | NA | 9  |
| [61] (Otsuka et al., 2006)                              | 2 | 2 | 2 | 2 | 1 | NA | 9  |
| [41] (Tao et al., 2018)<br>China                        | 2 | 2 | 2 | 2 | 2 | NA | 10 |
| [48] (Hurst & Fukuda, 2018)<br>Japan                    | 2 | 1 | 2 | 2 | 1 | 2  | 2  | 0  | NA | NA | NA | NA | 12 |
| [49] (Kudo et al., 2019)<br>Japan                       | 2 | 2 | 1 | 2 | 1 | 2  | 0  | 0  | NA | NA | NA | NA | 10 |

NA: Not Applicable.
